# Supplementary material for: Impact of Processing Methods on the In Vitro Protein Digestibility and DIAAS of Various Foods Produced by Millet, Highland Barley and Buckwheat
Source: MDPI journal article supplement (doi:10.3390/foods12081714), 2023-04-20
Supplement: s1 [file s1]

**Table S1**

**Amino acid (AA) compositions of raw grains, protein isolates (PI) and digest from cereal-based foods produced using grains (DPG) or flours (DPF) of millet, highland barley and buckwheat (g/100 g protein).**

| AA                 | Millet                  |                          |                          |                         | Highland barley          |                         |                         |                         | Buckwheat               |                         |                         |                         |
|--------------------|-------------------------|--------------------------|--------------------------|-------------------------|--------------------------|-------------------------|-------------------------|-------------------------|-------------------------|-------------------------|-------------------------|-------------------------|
|                    | Raw grains              | PI                       | DPG                      | DPF                     | Raw grains               | PI                      | DPG                     | DPF                     | Raw grains              | PI                      | DPG                     | DPF                     |
| Indispensable AA   |                         |                          |                          |                         |                          |                         |                         |                         |                         |                         |                         |                         |
| His                | 2.05±0.08 <sup>b</sup>  | 1.30±0.04 <sup>d</sup>   | 2.40±0.14 <sup>a</sup>   | 1.79±0.06 <sup>c</sup>  | 1.74±0.13 <sup>b</sup>   | 1.80±0.12 <sup>b</sup>  | 1.68±0.08 <sup>b</sup>  | 2.47±0.19 <sup>a</sup>  | 2.21±0.13 <sup>b</sup>  | 1.94±0.20 <sup>b</sup>  | 2.17±0.11 <sup>b</sup>  | 2.64±0.13 <sup>a</sup>  |
| Thr                | 3.38±0.09 <sup>bc</sup> | 3.03±0.06 <sup>c</sup>   | 4.32±0.26 <sup>a</sup>   | 3.60±0.14 <sup>b</sup>  | 2.89±0.14 <sup>c</sup>   | 3.01±0.09 <sup>c</sup>  | 3.97±0.19 <sup>b</sup>  | 4.77±0.08 <sup>a</sup>  | 4.65±0.10 <sup>b</sup>  | 4.64±0.18 <sup>b</sup>  | 4.36±0.19 <sup>b</sup>  | 5.17±0.15 <sup>a</sup>  |
| Tyr                | 3.66±0.09 <sup>c</sup>  | 4.33±0.22 <sup>b</sup>   | 4.89±0.23 <sup>a</sup>   | 4.52±0.04 <sup>ab</sup> | 4.03±0.15 <sup>c</sup>   | 4.92±0.07 <sup>b</sup>  | 4.92±0.34 <sup>b</sup>  | 5.41±0.13 <sup>a</sup>  | 3.43±0.11 <sup>c</sup>  | 3.77±0.10 <sup>bc</sup> | 3.95±0.27 <sup>ab</sup> | 4.16±0.08 <sup>a</sup>  |
| Val                | 4.89±0.06 <sup>a</sup>  | 4.61±0.08 <sup>b</sup>   | 4.68±0.10 <sup>b</sup>   | 4.32±0.03 <sup>c</sup>  | 4.57±0.18 <sup>b</sup>   | 4.43±0.04 <sup>b</sup>  | 4.53±0.10 <sup>b</sup>  | 5.14±0.13 <sup>a</sup>  | 4.83±0.03 <sup>a</sup>  | 4.64±0.20 <sup>a</sup>  | 3.88±0.04 <sup>b</sup>  | 4.51±0.24 <sup>a</sup>  |
| Met                | 2.65±0.09 <sup>a</sup>  | 1.75±0.03 <sup>c</sup>   | 2.45±0.16 <sup>a</sup>   | 2.60±0.01 <sup>a</sup>  | 1.76±0.13 <sup>c</sup>   | 1.21±0.05 <sup>d</sup>  | 2.21±0.14 <sup>b</sup>  | 2.66±0.09 <sup>a</sup>  | 2.31±0.14 <sup>b</sup>  | 1.15±0.11 <sup>c</sup>  | 2.32±0.03 <sup>b</sup>  | 2.99±0.12 <sup>a</sup>  |
| Cys                | 1.91±0.07 <sup>a</sup>  | 0.81±0.10 <sup>c</sup>   | 1.11±0.04 <sup>b</sup>   | 1.04±0.04 <sup>b</sup>  | 2.64±0.15 <sup>a</sup>   | 1.04±0.14 <sup>b</sup>  | 0.68±0.07 <sup>c</sup>  | 0.69±0.04 <sup>c</sup>  | 2.10±0.16 <sup>a</sup>  | 1.35±0.10 <sup>b</sup>  | 0.30±0.02 <sup>c</sup>  | 0.52±0.04 <sup>c</sup>  |
| Ile                | 4.85±0.33 <sup>a</sup>  | 4.71±0.13 <sup>a</sup>   | 3.21±0.21 <sup>b</sup>   | 2.88±0.05 <sup>b</sup>  | 4.29±0.07 <sup>a</sup>   | 4.17±0.08 <sup>a</sup>  | 3.55±0.19 <sup>b</sup>  | 3.20±0.06 <sup>c</sup>  | 4.34±0.10 <sup>b</sup>  | 4.74±0.16 <sup>a</sup>  | 3.52±0.14 <sup>c</sup>  | 3.12±0.04 <sup>d</sup>  |
| Leu                | 9.76±0.50 <sup>a</sup>  | 9.48±0.37 <sup>a</sup>   | 7.14±0.40 <sup>b</sup>   | 6.89±0.10 <sup>b</sup>  | 6.27±0.02 <sup>b</sup>   | 5.92±0.21 <sup>c</sup>  | 6.08±0.21 <sup>bc</sup> | 6.74±0.06 <sup>a</sup>  | 6.49±0.10 <sup>a</sup>  | 6.19±0.22 <sup>a</sup>  | 4.21±0.14 <sup>c</sup>  | 5.70±0.17 <sup>b</sup>  |
| Phe                | 5.31±0.11 <sup>a</sup>  | 5.27±0.23 <sup>a</sup>   | 4.70±0.27 <sup>b</sup>   | 4.57±0.10 <sup>b</sup>  | 4.70±0.08 <sup>b</sup>   | 4.99±0.06 <sup>a</sup>  | 4.46±0.10 <sup>c</sup>  | 5.13±0.12 <sup>a</sup>  | 4.46±0.15 <sup>b</sup>  | 5.01±0.08 <sup>a</sup>  | 4.30±0.08 <sup>b</sup>  | 4.99±0.16 <sup>a</sup>  |
| Lys                | 1.88±0.02 <sup>b</sup>  | 1.57±0.04 <sup>b</sup>   | 4.37±0.27 <sup>a</sup>   | 4.15±0.05 <sup>a</sup>  | 3.21±0.07 <sup>b</sup>   | 2.59±0.04 <sup>c</sup>  | 4.65±0.20 <sup>a</sup>  | 4.65±0.20 <sup>a</sup>  | 4.96±0.06 <sup>c</sup>  | 4.80±0.08 <sup>c</sup>  | 5.34±0.05 <sup>b</sup>  | 6.10±0.15 <sup>a</sup>  |
| Total <sup>1</sup> | 40.34±0.80 <sup>a</sup> | 36.86±0.47 <sup>bc</sup> | 39.28±1.94 <sup>ab</sup> | 36.36±0.28 <sup>c</sup> | 36.11±0.92 <sup>bc</sup> | 34.08±0.19 <sup>c</sup> | 36.73±1.48 <sup>b</sup> | 40.85±0.36 <sup>a</sup> | 39.80±0.72 <sup>a</sup> | 38.24±0.62 <sup>b</sup> | 34.34±0.50 <sup>c</sup> | 39.91±0.24 <sup>a</sup> |

# Dispensable AA

|                    |                         |                          |                          |                         |                         |                         |                         |                         |                          |                          |                          |                         |
|--------------------|-------------------------|--------------------------|--------------------------|-------------------------|-------------------------|-------------------------|-------------------------|-------------------------|--------------------------|--------------------------|--------------------------|-------------------------|
| Asp                | 6.55±0.25 <sup>d</sup>  | 7.51±0.16 <sup>c</sup>   | 8.61±0.47 <sup>b</sup>   | 14.62±0.16 <sup>a</sup> | 6.80±0.29 <sup>bc</sup> | 7.10±0.11 <sup>b</sup>  | 8.04±0.03 <sup>a</sup>  | 6.51±0.13 <sup>c</sup>  | 11.63±0.08 <sup>a</sup>  | 9.50±0.40 <sup>b</sup>   | 10.91±0.83 <sup>a</sup>  | 8.74±0.51 <sup>b</sup>  |
| Glu                | 18.25±0.96 <sup>b</sup> | 20.04±0.17 <sup>a</sup>  | 16.04±1.03 <sup>c</sup>  | 15.48±0.58 <sup>c</sup> | 23.71±0.59 <sup>b</sup> | 25.60±0.72 <sup>a</sup> | 20.47±0.38 <sup>c</sup> | 14.43±0.30 <sup>d</sup> | 19.04±0.32 <sup>bc</sup> | 21.29±0.81 <sup>a</sup>  | 20.58±1.24 <sup>ab</sup> | 17.31±0.92 <sup>c</sup> |
| Ser                | 4.43±0.10 <sup>b</sup>  | 4.14±0.16 <sup>b</sup>   | 5.00±0.31 <sup>a</sup>   | 4.51±0.11 <sup>b</sup>  | 3.77±0.15 <sup>b</sup>  | 3.92±0.02 <sup>b</sup>  | 5.11±0.12 <sup>a</sup>  | 4.79±0.23 <sup>a</sup>  | 4.78±0.26 <sup>c</sup>   | 4.86±0.16 <sup>c</sup>   | 5.32±0.22 <sup>b</sup>   | 5.85±0.09 <sup>a</sup>  |
| Gly                | 2.38±0.06 <sup>c</sup>  | 2.02±0.05 <sup>d</sup>   | 5.52±0.23 <sup>a</sup>   | 5.05±0.06 <sup>b</sup>  | 3.33±0.14 <sup>c</sup>  | 3.16±0.04 <sup>c</sup>  | 5.64±0.09 <sup>a</sup>  | 4.72±0.15 <sup>b</sup>  | 5.08±0.16 <sup>c</sup>   | 4.58±0.25 <sup>c</sup>   | 6.39±0.16 <sup>a</sup>   | 5.69±0.39 <sup>b</sup>  |
| Arg                | 5.62±0.24 <sup>b</sup>  | 6.82±0.06 <sup>a</sup>   | 5.31±0.41 <sup>b</sup>   | 5.24±0.08 <sup>b</sup>  | 5.72±0.57 <sup>a</sup>  | 6.08±0.28 <sup>a</sup>  | 6.03±0.52 <sup>a</sup>  | 5.50±0.21 <sup>a</sup>  | 6.53±0.06 <sup>c</sup>   | 7.95±0.32 <sup>a</sup>   | 7.24±0.20 <sup>b</sup>   | 7.23±0.13 <sup>b</sup>  |
| Ala                | 7.56±0.08 <sup>a</sup>  | 7.44±0.10 <sup>a</sup>   | 6.04±0.44 <sup>b</sup>   | 5.89±0.07 <sup>b</sup>  | 3.38±0.13 <sup>b</sup>  | 3.30±0.07 <sup>b</sup>  | 4.39±0.20 <sup>a</sup>  | 4.23±0.33 <sup>a</sup>  | 4.02±0.06 <sup>a</sup>   | 3.38±0.17 <sup>b</sup>   | 3.50±0.14 <sup>b</sup>   | 3.67±0.39 <sup>ab</sup> |
| Pro                | 6.53±0.03 <sup>ab</sup> | 6.90±0.05 <sup>a</sup>   | 6.42±0.33 <sup>b</sup>   | 5.82±0.07 <sup>c</sup>  | 9.08±0.44 <sup>b</sup>  | 10.19±0.11 <sup>a</sup> | 9.16±0.40 <sup>b</sup>  | 10.46±0.24 <sup>a</sup> | 3.24±0.30 <sup>b</sup>   | 3.65±0.12 <sup>b</sup>   | 4.59±0.11 <sup>a</sup>   | 4.77±0.24 <sup>a</sup>  |
| Total <sup>2</sup> | 51.33±0.83 <sup>c</sup> | 54.88±0.50 <sup>ab</sup> | 52.94±2.86 <sup>bc</sup> | 56.60±0.47 <sup>a</sup> | 55.79±0.09 <sup>b</sup> | 59.36±0.93 <sup>a</sup> | 58.85±1.38 <sup>a</sup> | 50.64±0.66 <sup>c</sup> | 54.32±0.14 <sup>b</sup>  | 55.20±1.41 <sup>ab</sup> | 58.52±2.12 <sup>a</sup>  | 53.27±2.18 <sup>b</sup> |
| TAA <sup>3</sup>   | 91.67±0.28              | 91.74±0.76               | 92.22±4.80               | 92.96±0.25              | 91.91±0.99              | 93.44±0.92              | 95.58±2.76              | 91.49±0.86              | 94.12±0.81               | 93.44±1.59               | 92.86±1.74               | 93.19±0.2.09            |

<sup>1</sup> Total, combined of all indispensable amino acids.

<sup>2</sup> Total, combined of all dispensable amino acids.

<sup>3</sup> TAA, combined total of all amino acids.

<sup>a, b, c</sup> AA within a row in each kind of cereal with different superscript letters were significantly different (p < 0.05).

Values were means ± SD (n = 3).

**Table S2**  
**Amino acid score of raw grains from millet, highland barley and buckwheat.**

| Samples                        | Millet | Highland barley | Buckwheat | Reference pattern<br>(mg /g protein) |
|--------------------------------|--------|-----------------|-----------|--------------------------------------|
| Child (6 months to 3 years)    |        |                 |           |                                      |
| Ile                            | 1.52   | 1.34            | 1.36      | 32                                   |
| Leu                            | 1.48   | 0.95            | 0.98      | 66                                   |
| Lys                            | 0.33   | 0.56            | 0.87      | 57                                   |
| Thr                            | 1.09   | 0.93            | 1.50      | 31                                   |
| Val                            | 1.14   | 1.06            | 1.12      | 43                                   |
| His                            | 1.03   | 0.87            | 1.11      | 20                                   |
| Sulfur AA                      | 1.69   | 1.63            | 1.63      | 27                                   |
| Aromatic AA                    | 1.72   | 1.68            | 1.52      | 52                                   |
| Limiting AA <sup>1</sup>       | Lys    | Lys             | Lys       |                                      |
| Older child, adolescent, adult |        |                 |           |                                      |
| Ile                            | 1.62   | 1.43            | 1.45      | 30                                   |
| Leu                            | 1.60   | 1.03            | 1.06      | 61                                   |
| Lys                            | 0.39   | 0.67            | 1.03      | 48                                   |
| Thr                            | 1.35   | 1.16            | 1.86      | 25                                   |
| Val                            | 1.22   | 1.14            | 1.21      | 40                                   |
| His                            | 1.28   | 1.09            | 1.38      | 16                                   |
| Sulfur AA                      | 1.98   | 1.92            | 1.92      | 23                                   |
| Aromatic AA                    | 2.19   | 2.13            | 1.93      | 41                                   |
| Limiting AA <sup>1</sup>       | Lys    | Lys             | N         |                                      |

<sup>1</sup>Indicated the first limiting AA, the first limiting AA was the one with the lowest AAS value and all AAS values were higher than or equal to 100 indicated that no AA was limiting.

Values were means  $\pm$  SD (n = 3).
